# Supplementary material for: Combining coordination and supramolecular chemistry to explore uranyl assembly in the solid state
Source: Royal Society of Chemistry journal article supplement (doi:10.1039/c4qi00183d), 2014-12-10
Supplement: c4qi00183d1.pdf [file c4qi00183d1.pdf]

**Combining coordination and supramolecular chemistry to explore uranyl assembly  
in the solid state**

Korey P. Carter and Christopher L. Cahill\*

Department of Chemistry, The George Washington University, 725 21<sup>st</sup> Street, NW,  
Washington, D.C. 20052, United States

*E-mail:*cahill@gwu.edu

**Supporting Info Section**

**I. Additional Figures**

**II. Powder X-ray Diffraction data**

**III. Thermal Ellipsoid Plots**

**IV. Tables of Bond Distances**

**V. Bond Valence Summations**

**VI. References**

## I. Additional Figures

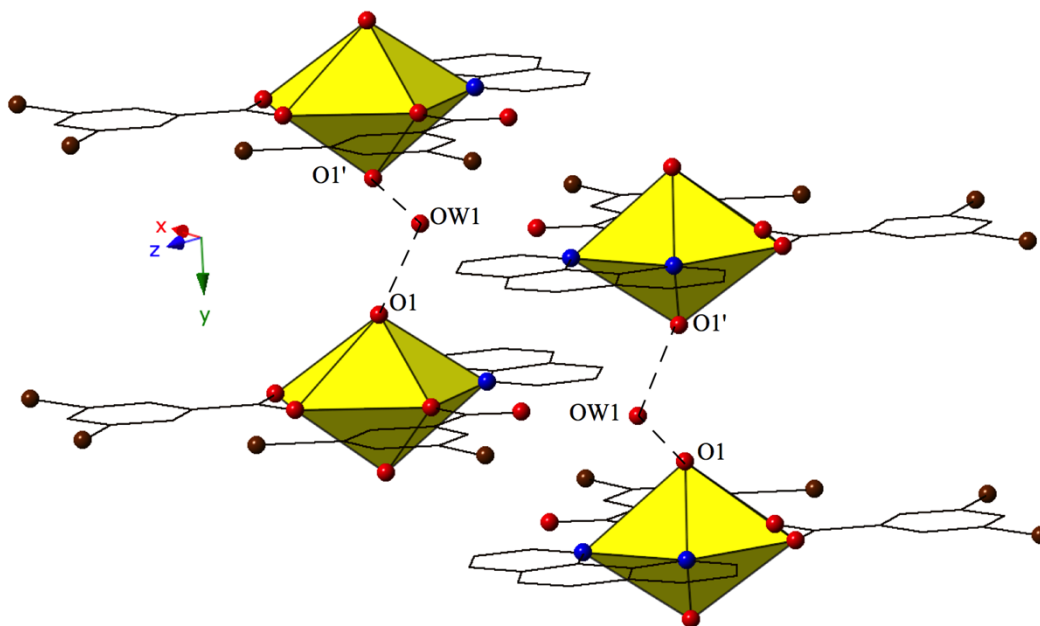

**Figure S1:** Complex 3 shown down the [010] direction highlighting the hydrogen bonding interactions that decorate the 1D chain of uranyl monomers.

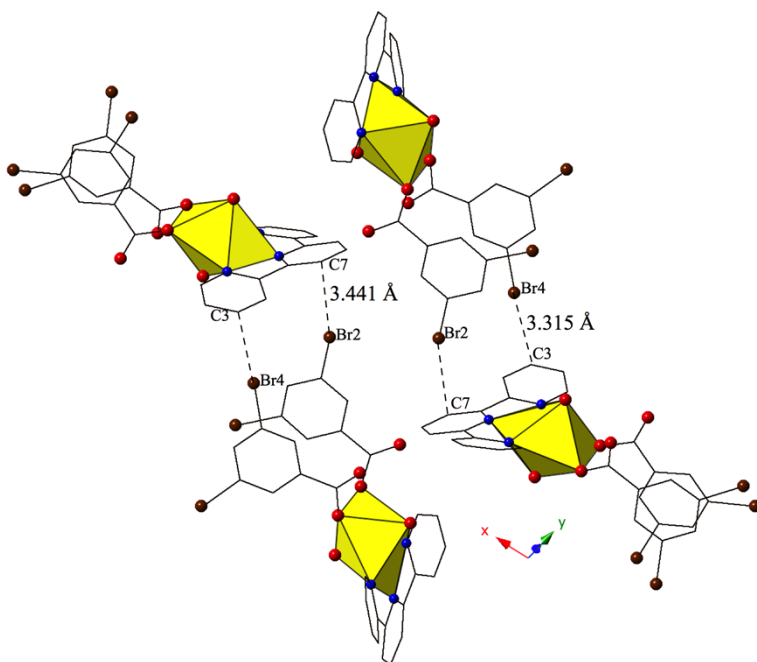

**Figure S2:** Complex 7 viewed down approximately the [110] direction highlighting the localized Br- $\pi$  interactions that assemble neighboring uranyl monomers.

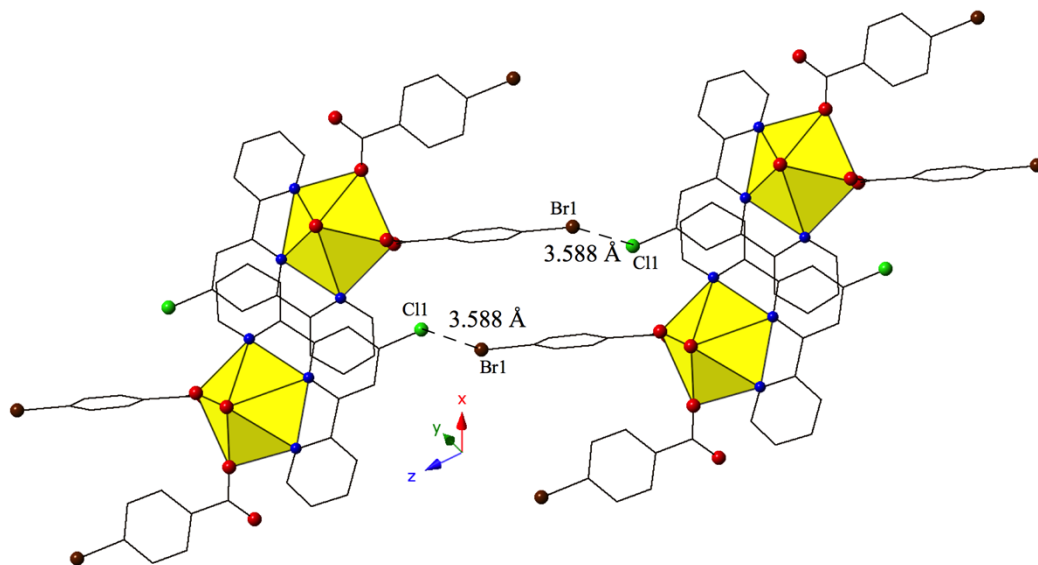

**Figure S3:** Complex **10** viewed down approximately the [011] direction highlighting the Type I Br-Cl interaction that links neighboring uranyl monomers.

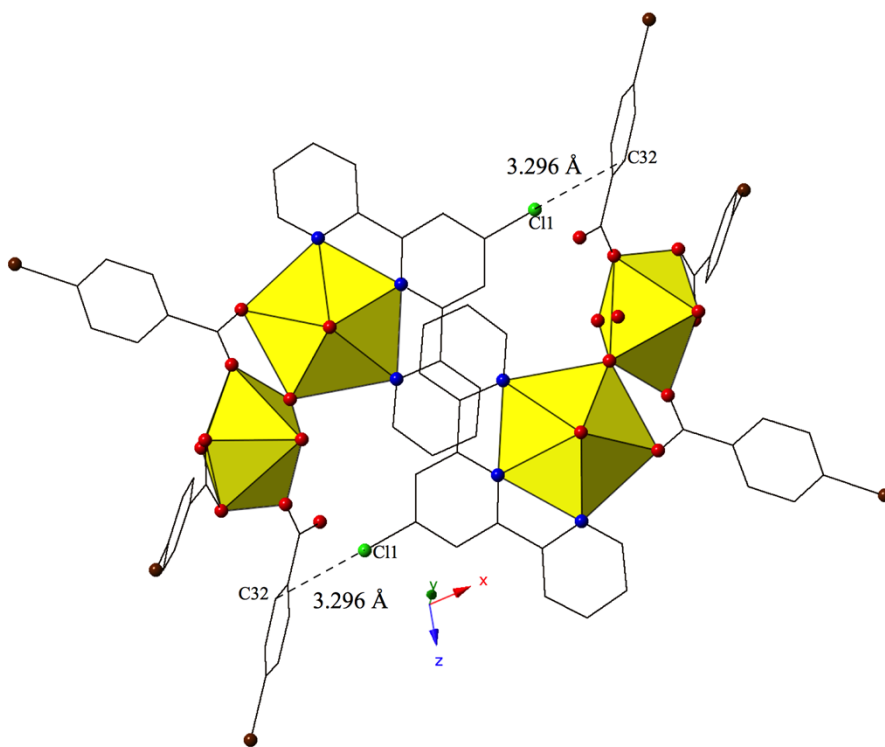

**Figure S4:** Complex **12** viewed along approximately the [100] direction highlighting the localized Cl- $\pi$  interaction that links adjacent uranyl dimers.

## II. Powder X-ray diffraction data

For the following PXRD spectra it is important to note that calculated patterns are from low temperature (100K) (complexes **1**, **3**, **7** and **11**) data collections while observed patterns were collected at room temperature (298 K). This difference may result in slight shifts in two-theta values. For complexes **2**, **4-6**, **8-10** and **12** calculated and observed patterns were both collected a room temperature (298K).

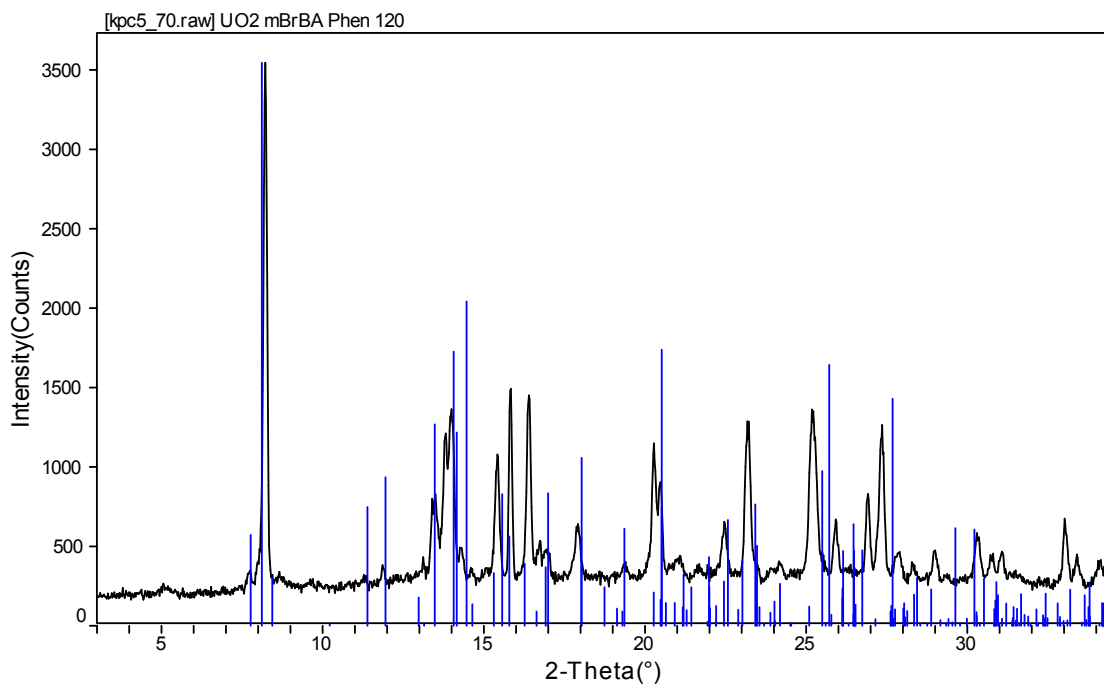

**Figure S5:** The observed PXRD pattern of structure **1** with calculated pattern overlaid in blue.

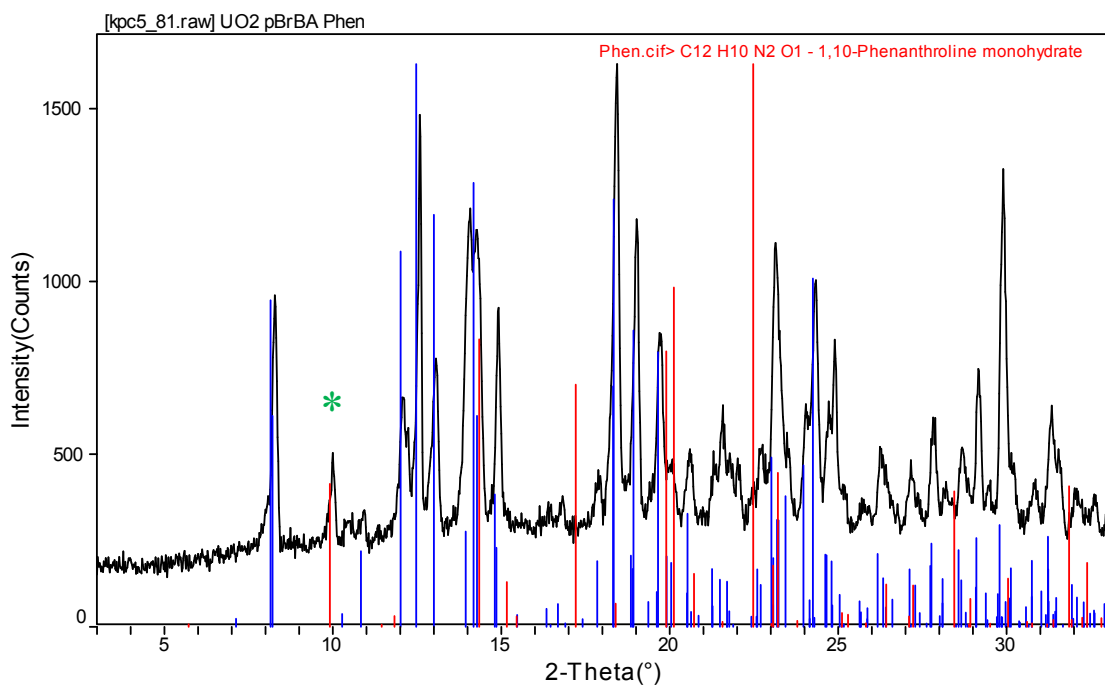

**Figure S6:** The observed PXRD pattern of structure **2** with calculated pattern overlaid in blue. We acknowledge a minor impurity as indicated with an asterisk and we have identified this impurity as excess 1,10-phenanthroline (calculated CIF overlaid in red).

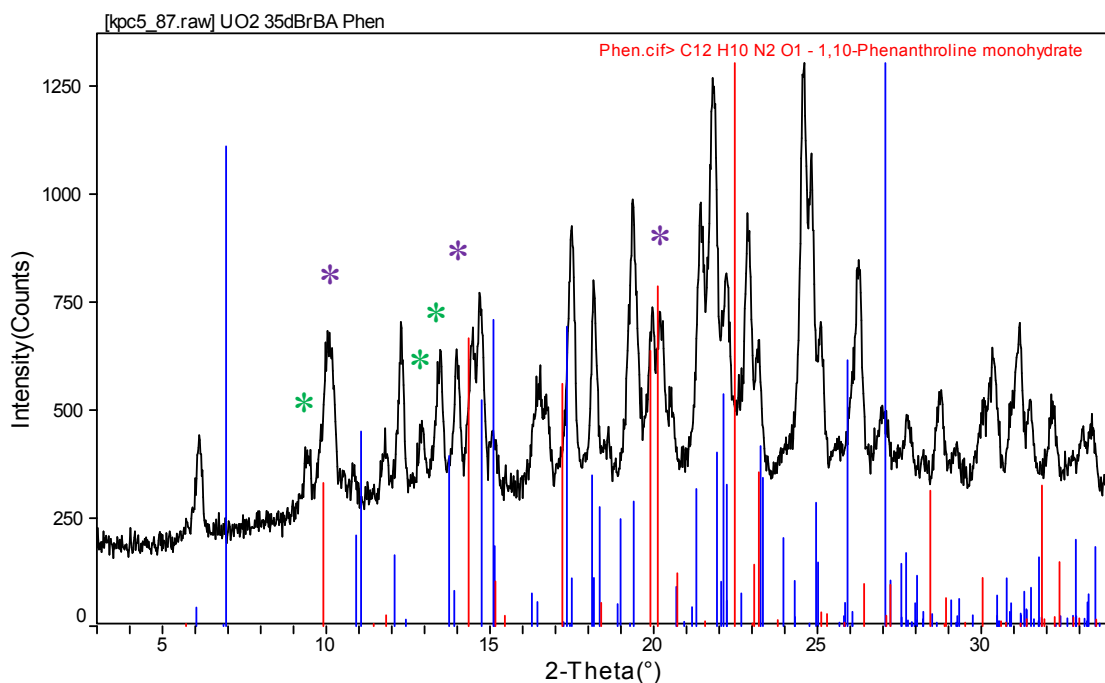

**Figure S7:** The observed PXRD pattern of structure **3** with calculated pattern overlaid in blue. We acknowledge several impurities in the bulk product. Some of these impurities have been identified as 1,10-phenanthroline (calculated CIF overlaid in red) and these are indicated with purple asterisks. Impurities that could not be identified are indicated with green asterisks.

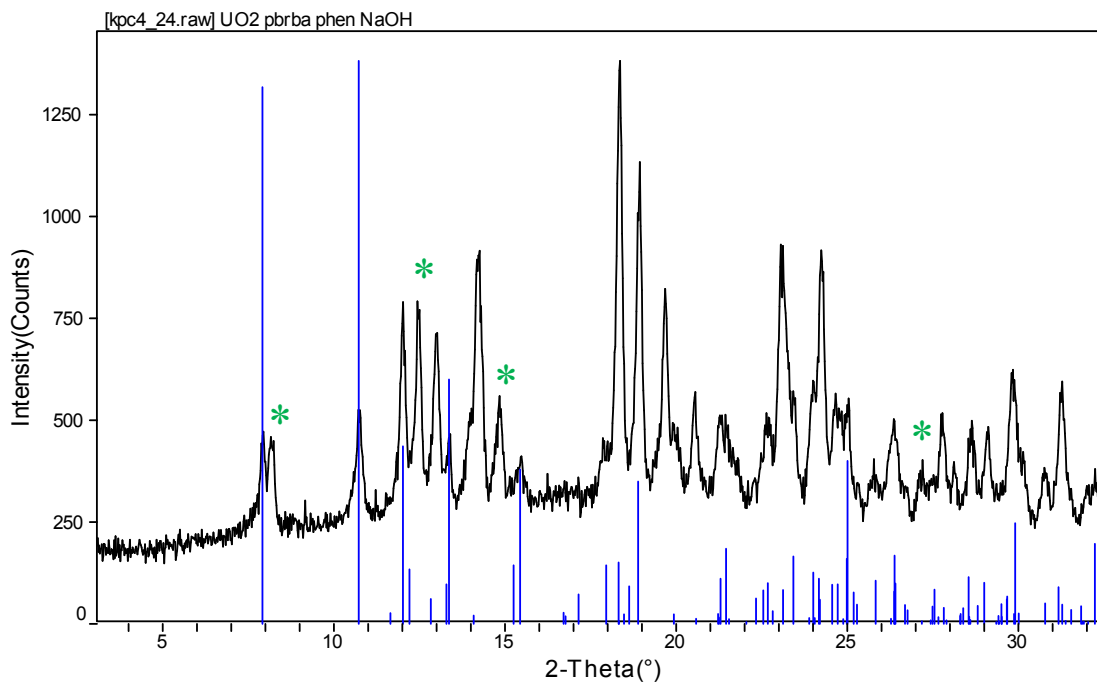

**Figure S8:** The observed PXRD pattern of structure **4** with calculated pattern overlaid in blue. We acknowledge several impurities as indicated with asterisks.

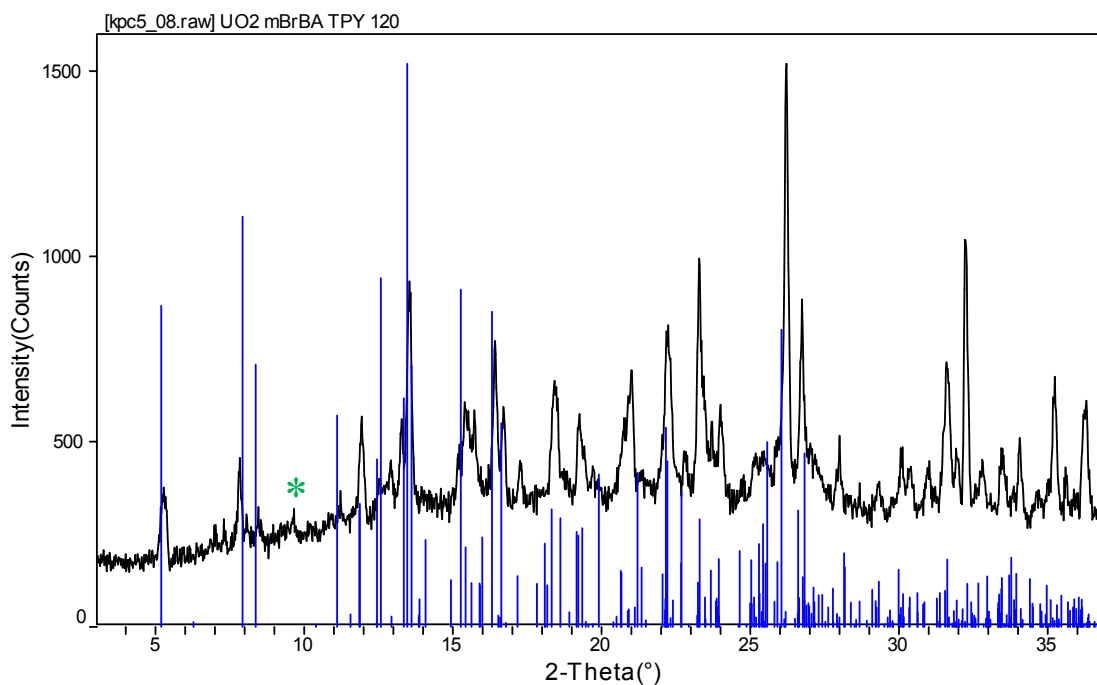

**Figure S9:** The observed PXRD pattern of structure **5** with calculated pattern overlaid in blue. We acknowledge a minor impurity as indicated with an asterisk.

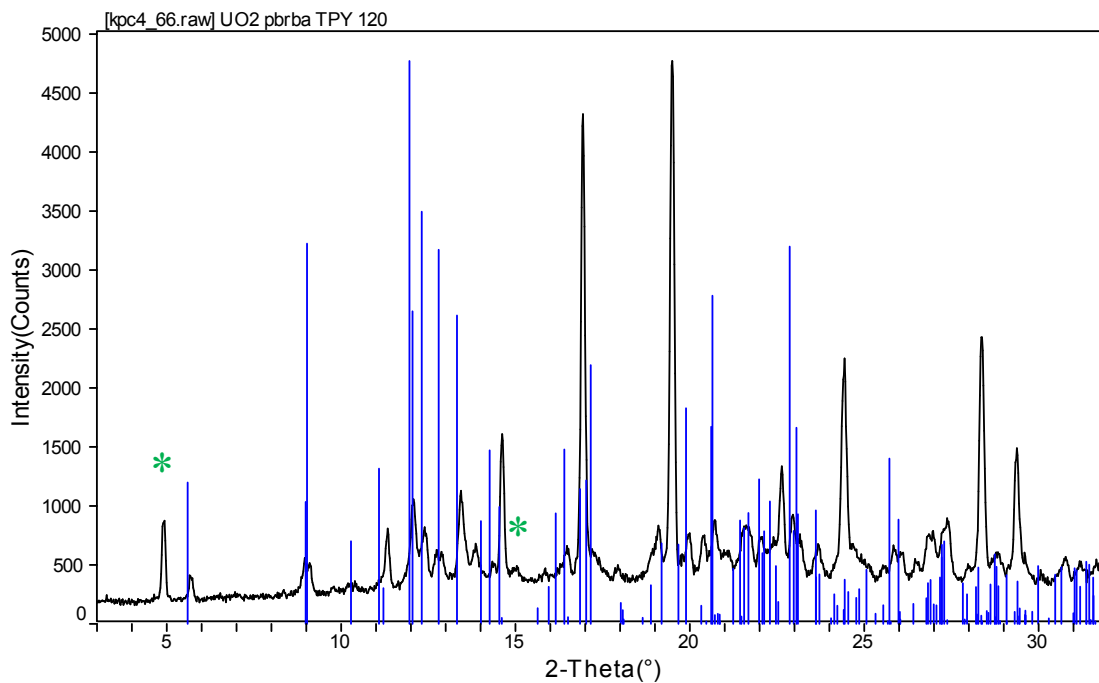

**Figure S10:** The observed PXRD pattern of structure **6** with calculated pattern overlaid in blue. We acknowledge two minor impurities as indicated with asterisks.

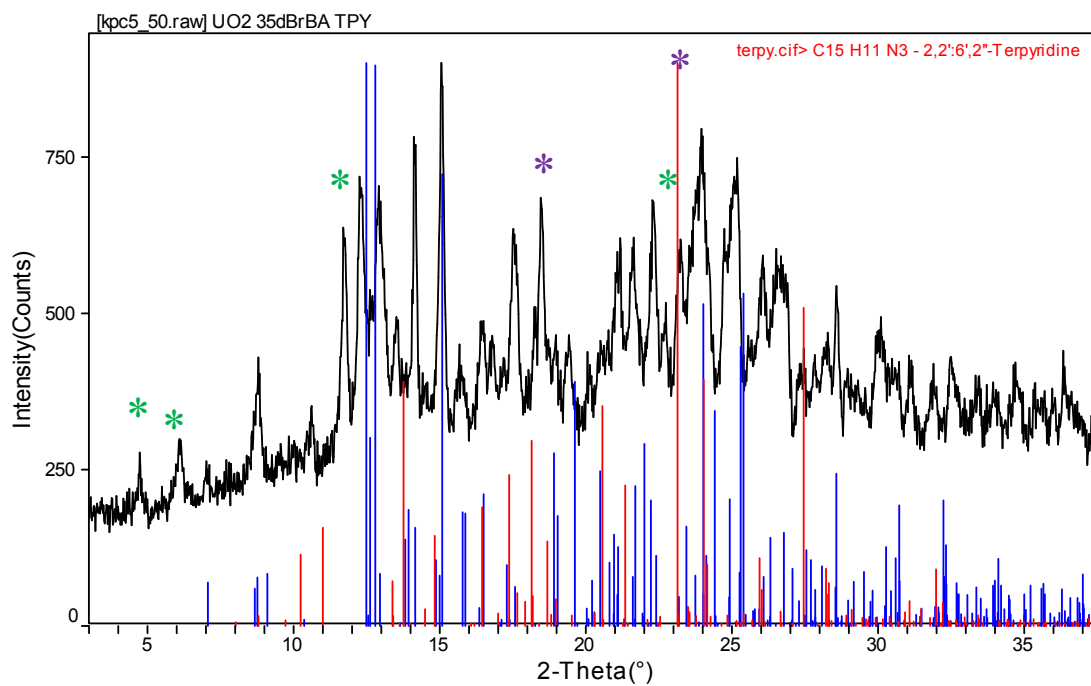

**Figure S11:** The observed PXRD pattern of structure **7** with calculated pattern overlaid in blue. We acknowledge several impurities in the bulk product. Some of these impurities



have been identified as 2,2':6',2''-terpyridine (calculated CIF overlaid in red) and these are indicated with purple asterisks. Impurities that could not be identified are indicated with green asterisks.

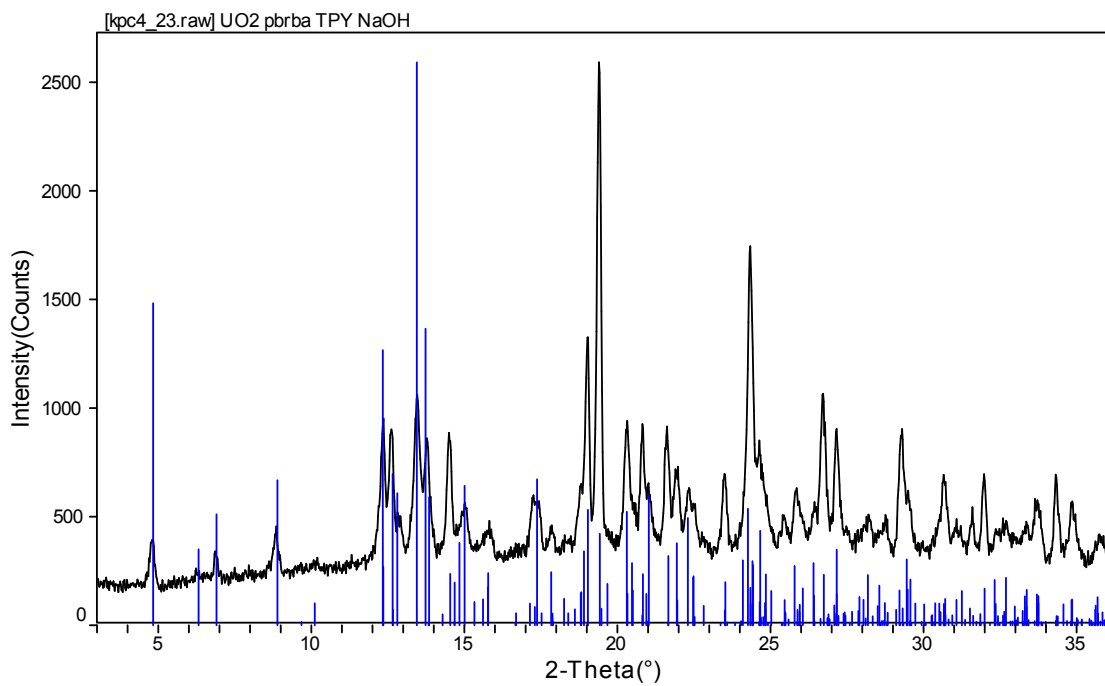

**Figure S12:** The observed PXRD pattern of structure **8** with calculated pattern overlaid in blue.

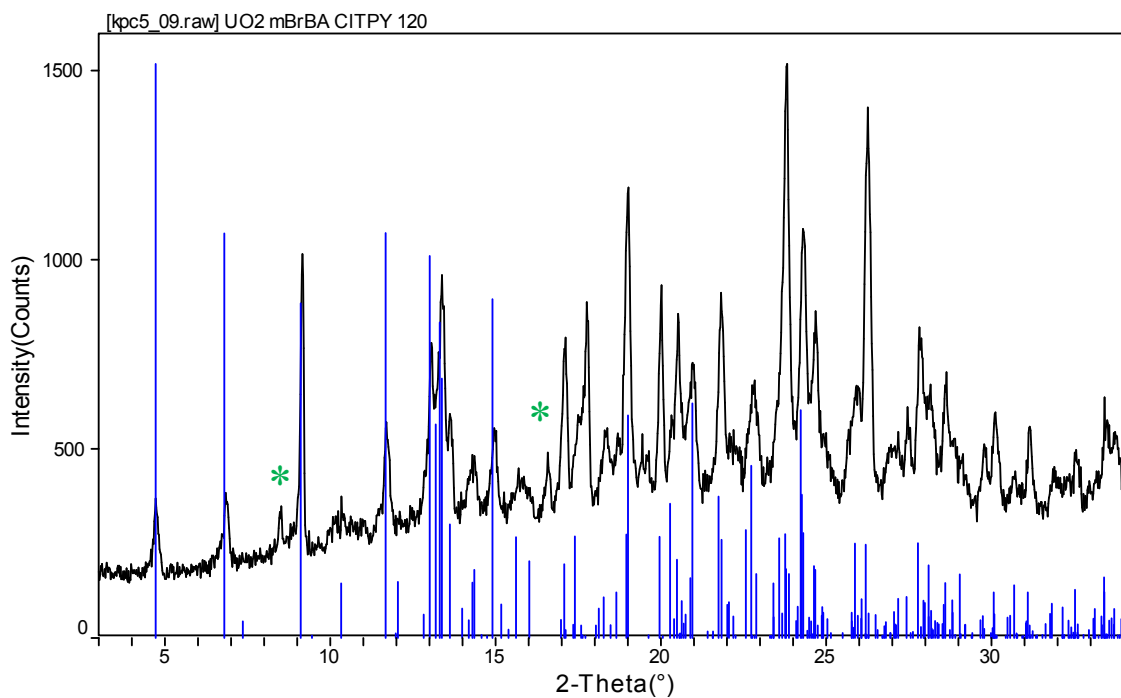

**Figure S13:** The observed PXR D pattern of structure **9** with calculated pattern overlaid in blue. We acknowledge two minor impurities as indicated with asterisks.

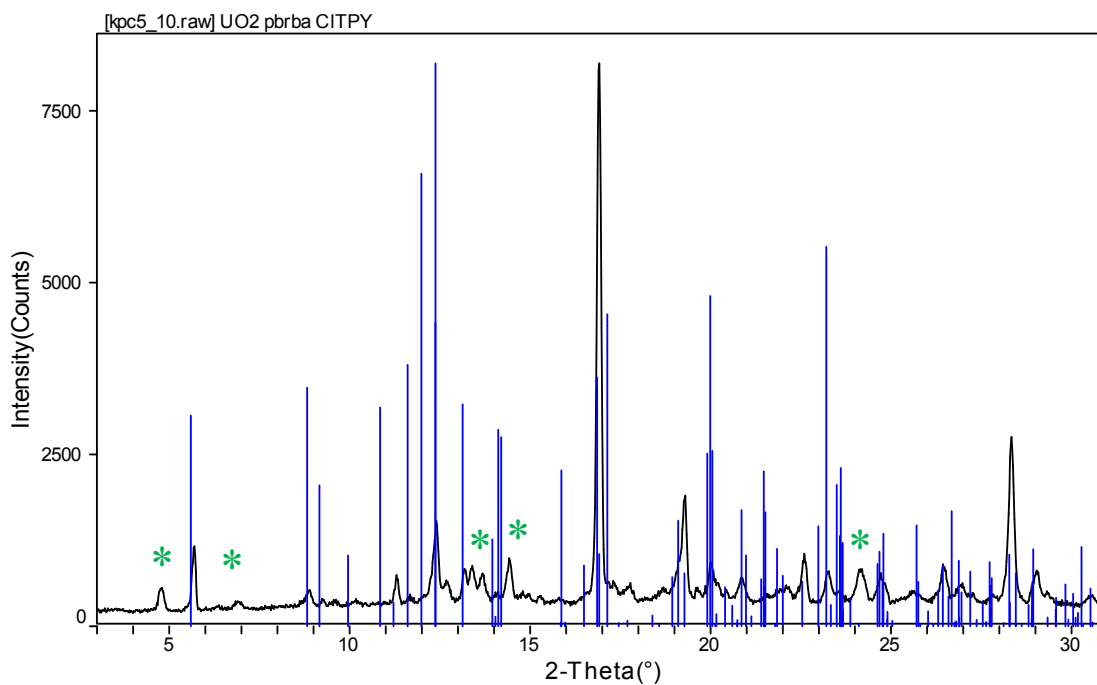

**Figure S14:** The observed PXR D pattern of structure **10** with calculated pattern overlaid in blue. We acknowledge a number of minor impurities as indicated with asterisks.

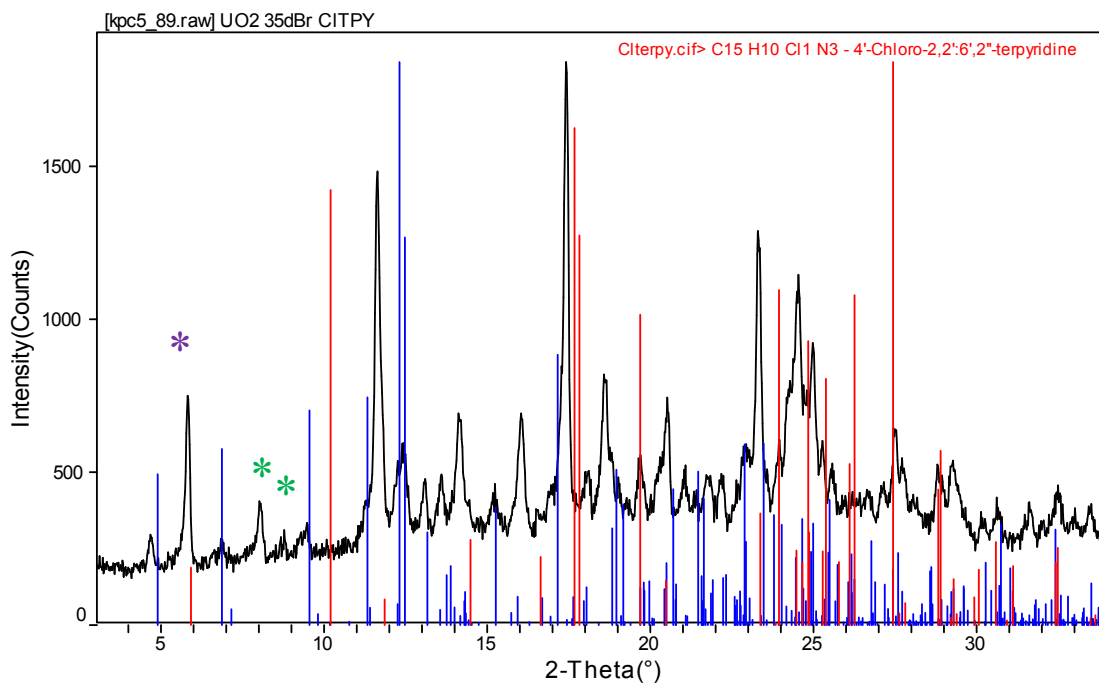

**Figure S15:** The observed PXR D pattern of structure **11** with calculated pattern overlaid in blue. We acknowledge a couple of minor impurities in the bulk product. One of these impurities was identified as 4'-chloro-2,2':6',2''-terpyridine (calculated CIF overlaid in red) and it is indicated with a purple asterisk. Impurities that could not be identified are indicated with green asterisks.

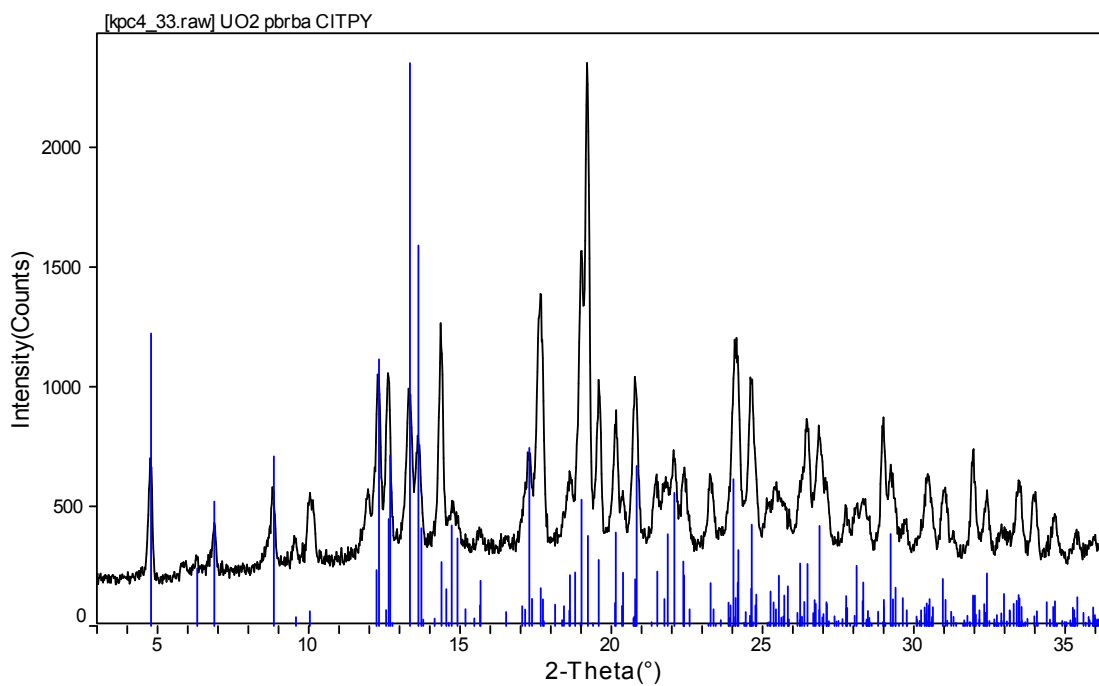

**Figure S16:** The observed PXR D pattern of structure **12** with calculated pattern overlaid in blue.

### III. Thermal Ellipsoid Plots

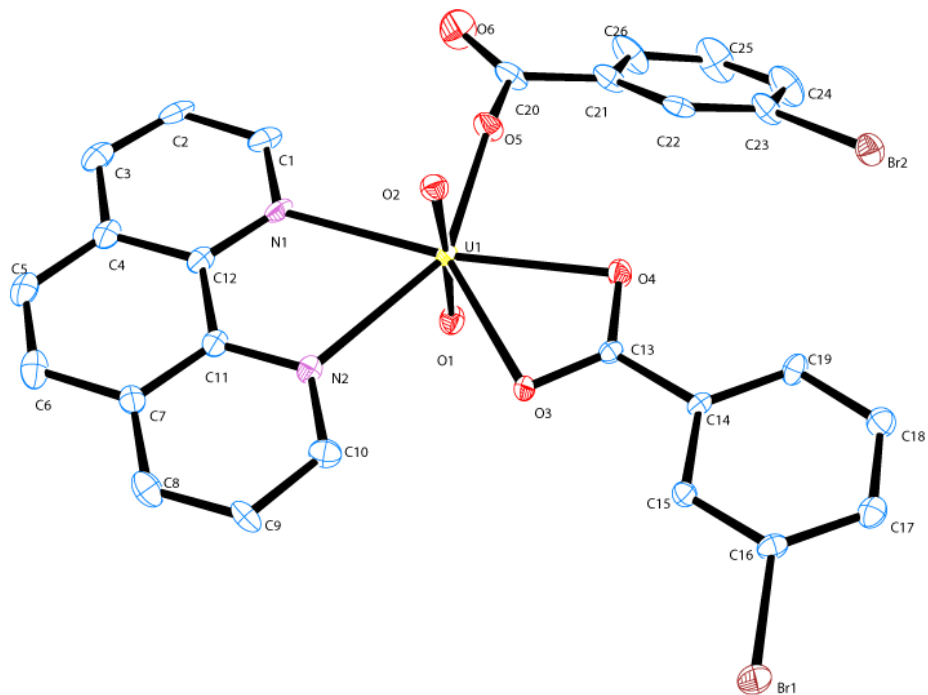

**Figure S17:** ORTEP illustration of complex 1. Ellipsoids are shown at 50% probability level.

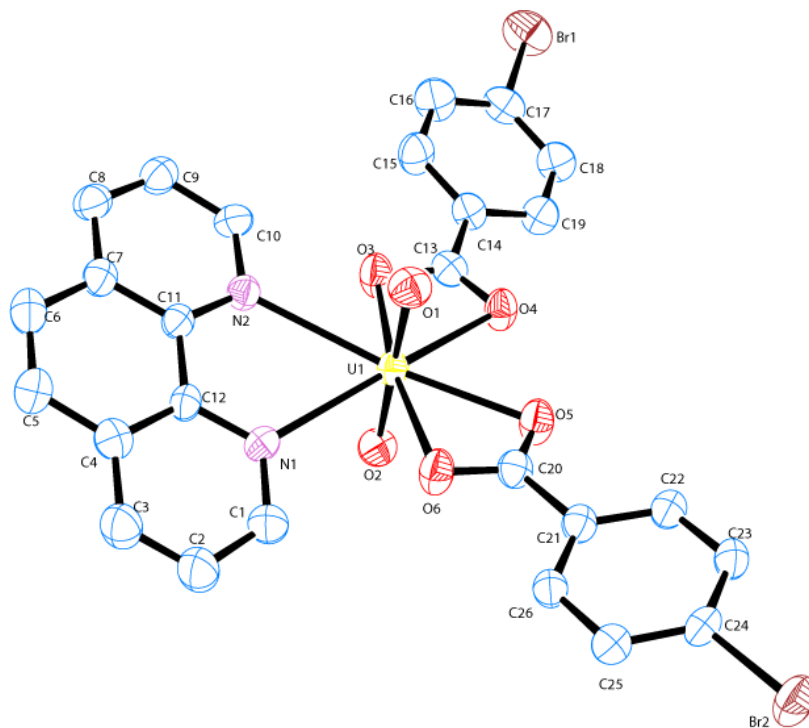

**Figure S18:** ORTEP illustration of structure 2. Ellipsoids are shown at 50% probability level.

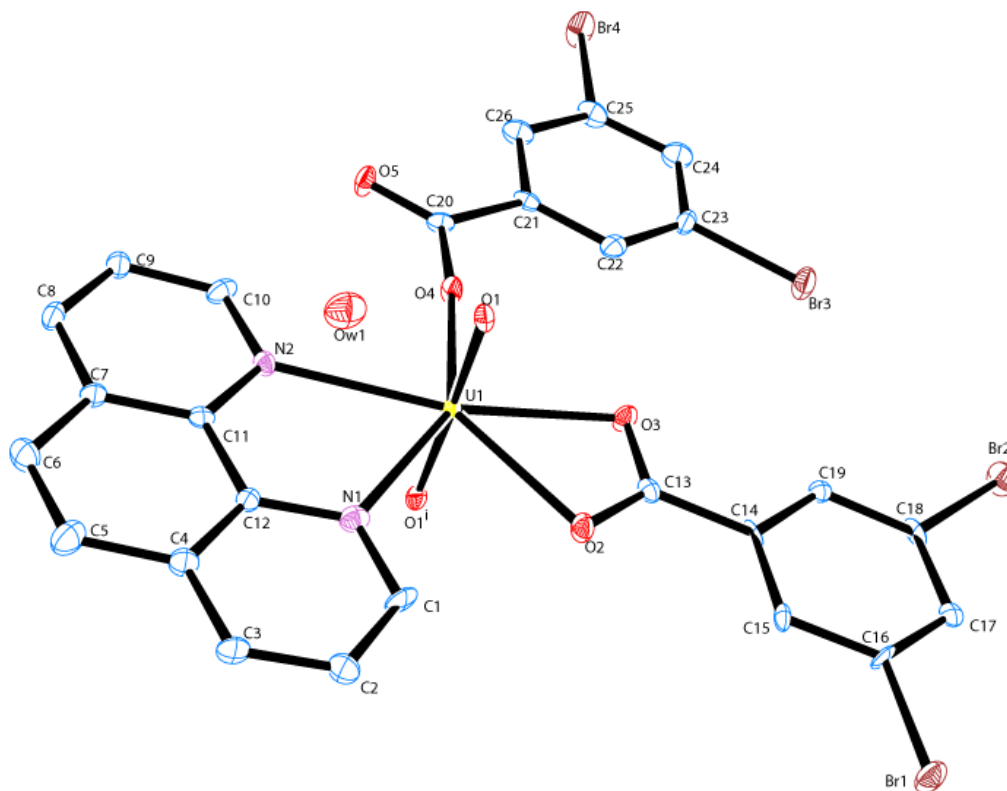

**Figure S19:** ORTEP illustration of structure 3. Ellipsoids are shown at 50% probability level. Atoms labelled with an “i” are reproduced through symmetry.

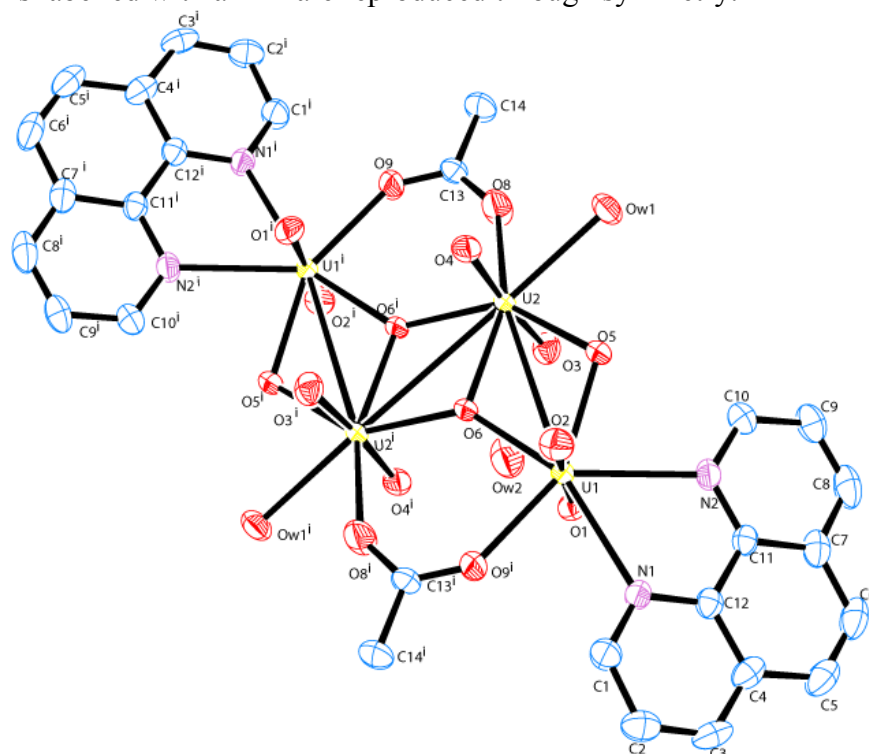

**Figure S20:** ORTEP illustration of structure 4. Ellipsoids are shown at 50% probability level. Atoms labelled with an “i” are reproduced through symmetry.

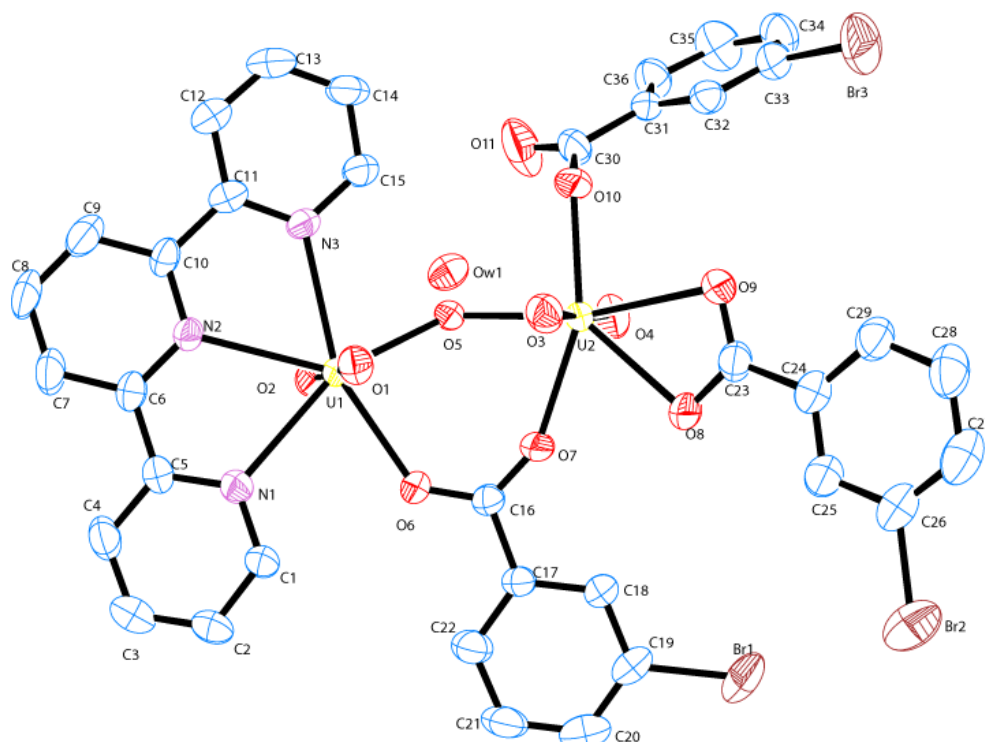

**Figure S21:** ORTEP illustration of complex **5**. Ellipsoids are shown at 50% probability level.

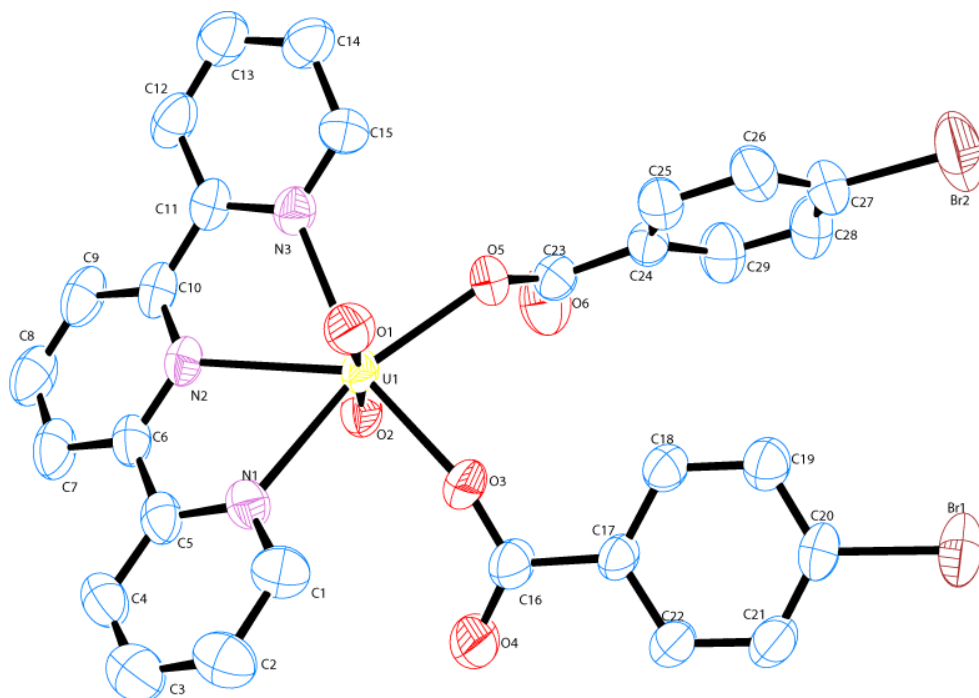

**Figure S22:** ORTEP illustration of structure **6**. Ellipsoids are shown at 50% probability level.

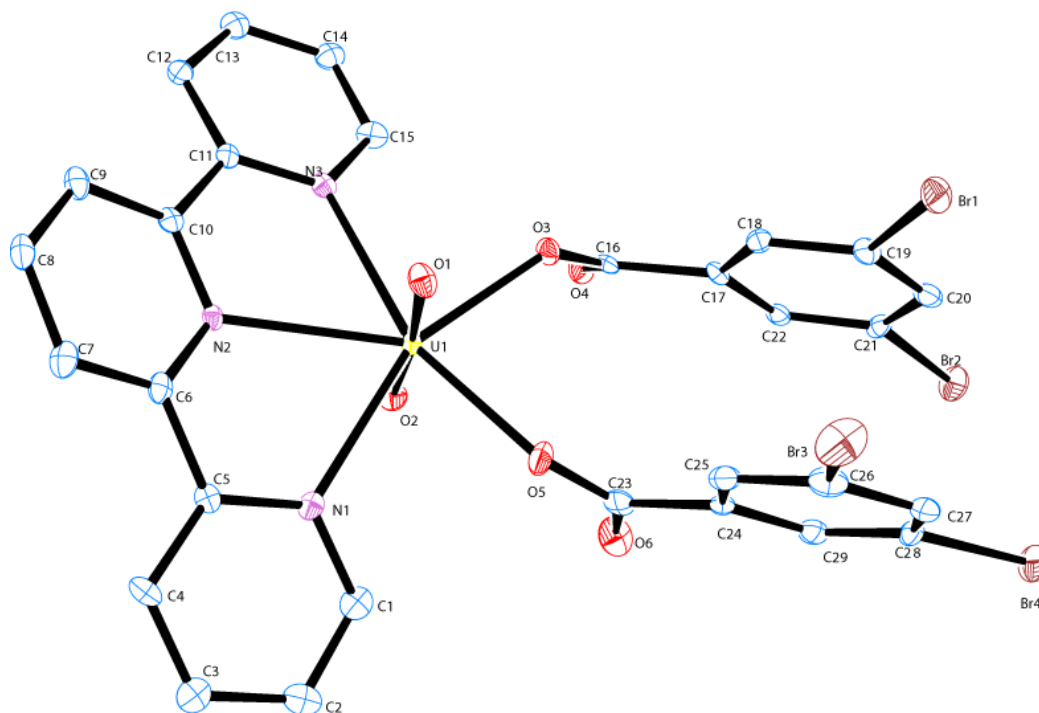

**Figure S23:** ORTEP illustration of structure 7. Ellipsoids are shown at 50% probability level.

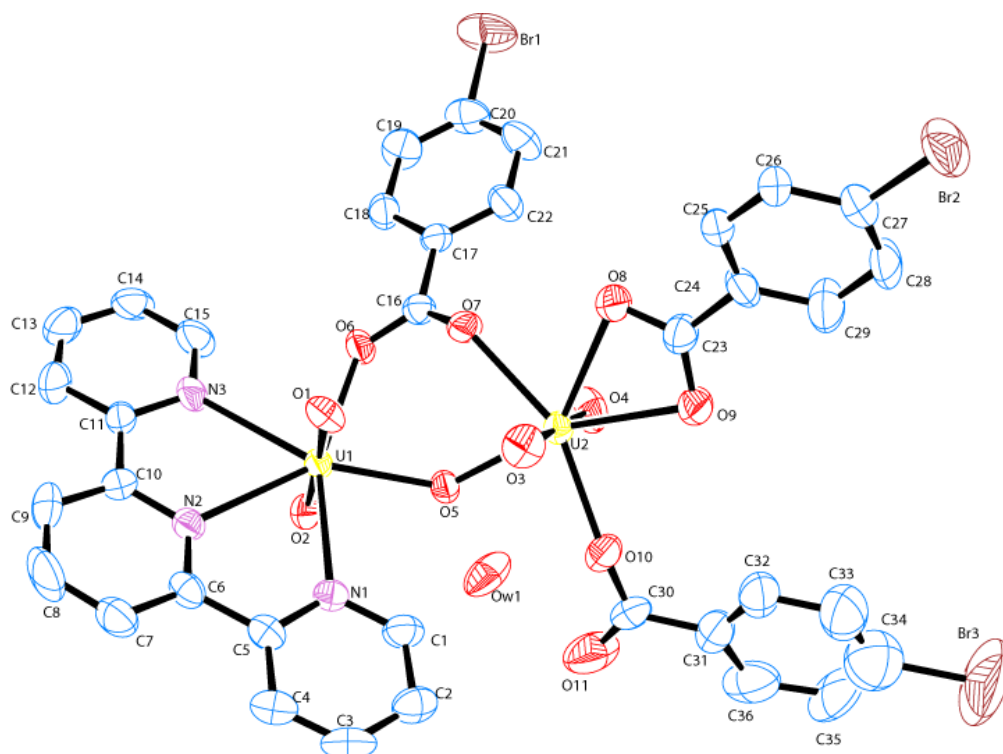

**Figure S24:** ORTEP illustration of structure 8. Ellipsoids are shown at 50% probability level.

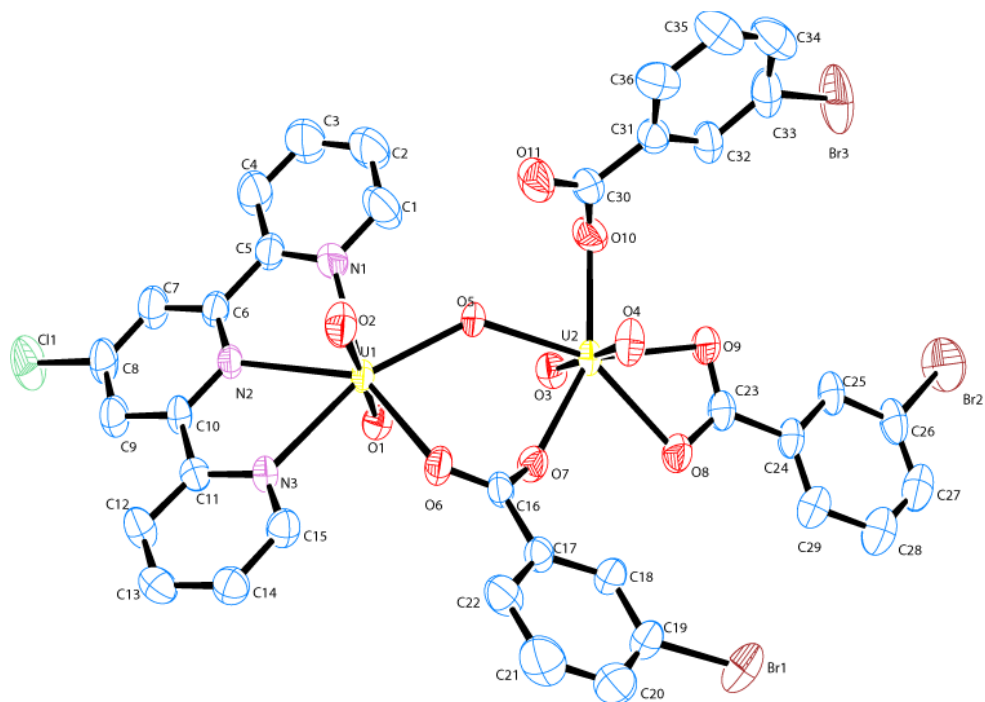

**Figure S25:** ORTEP illustration of structure 9. Ellipsoids are shown at 50% probability level.

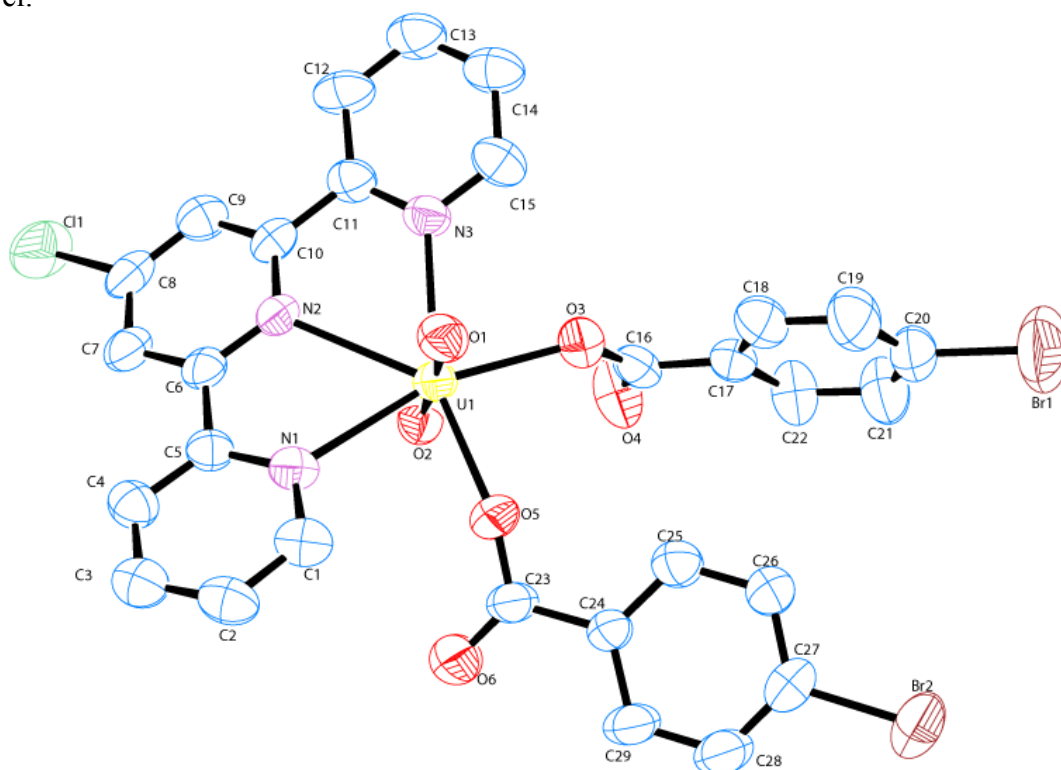

**Figure S26:** ORTEP illustration of structure 10. Ellipsoids are shown at 50% probability level.



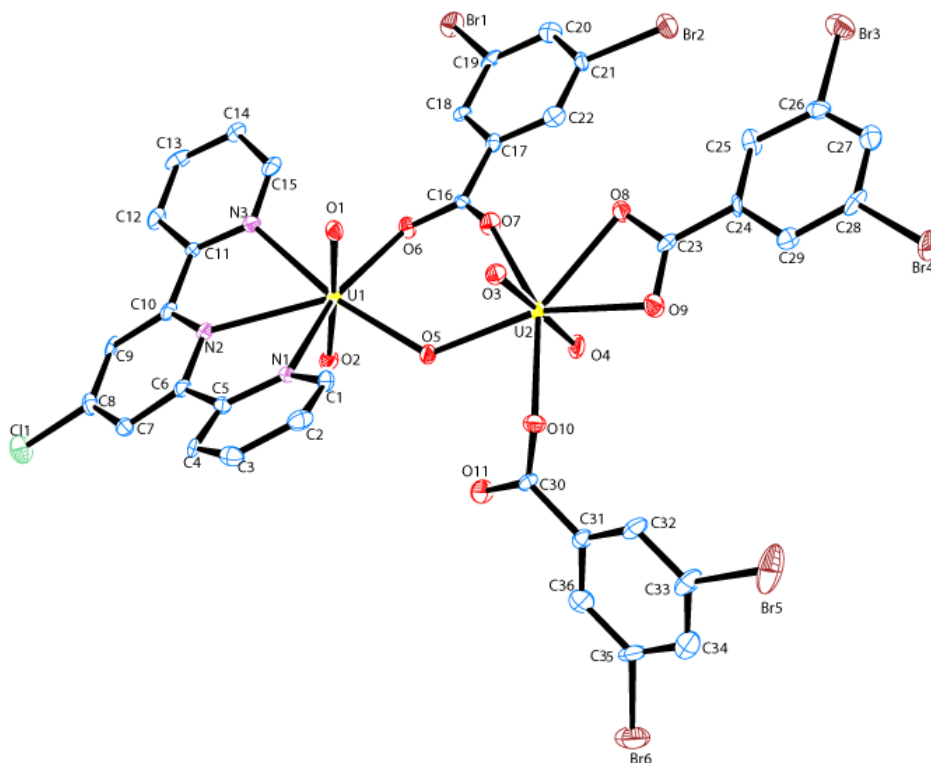

**Figure S27:** ORTEP illustration of structure 11. Ellipsoids are shown at 50% probability level.

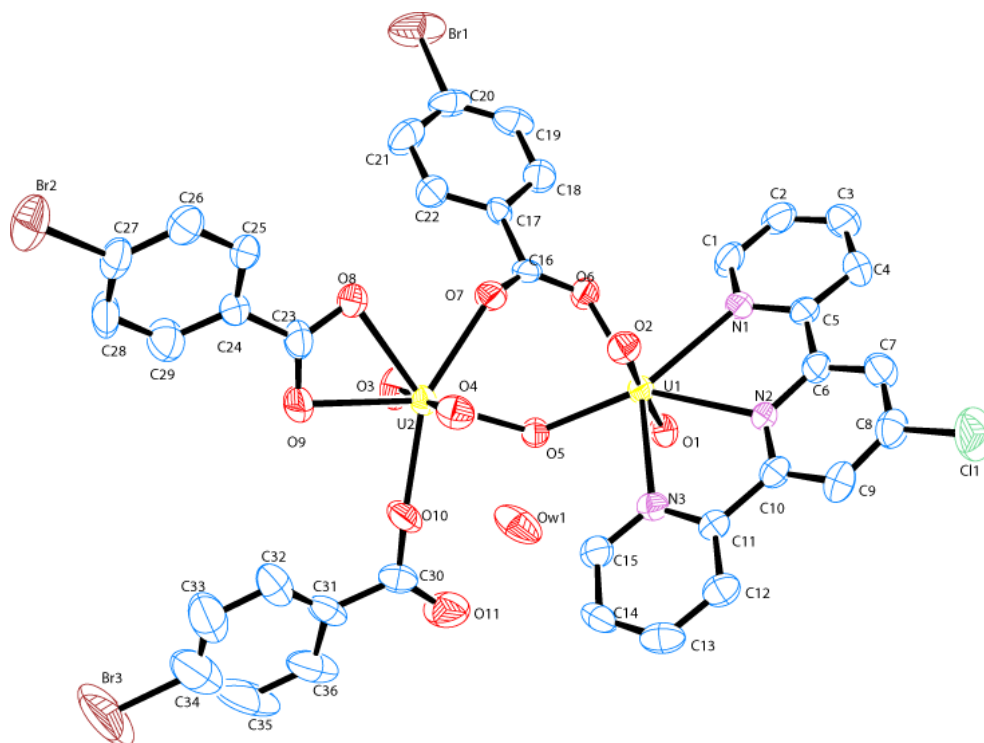

**Figure S28:** ORTEP illustration of structure 12. Ellipsoids are shown at 50% probability level.

#### IV. Tables of Bond Distances

**Table S1:** U-O Axial Bond Lengths in  $\text{UO}_2^{2+}$  complexes (1-12).

| Complex | $d_{\text{U1-O1}}$<br>[Å] | $d_{\text{U1-O2}}$<br>[Å] | $d_{\text{U2-O3}}$<br>[Å] | $d_{\text{U2-O4}}$<br>[Å] |
|---------|---------------------------|---------------------------|---------------------------|---------------------------|
| 1       | 1.780(3)                  | 1.769(2)                  |                           |                           |
| 2       | 1.764(3)                  | 1.755(3)                  |                           |                           |
| 3       | 1.773(3)                  |                           |                           |                           |
| 4       | 1.776(3)                  | 1.799(3)                  | 1.794(3)                  | 1.794(3)                  |
| 5       | 1.765(3)                  | 1.758(3)                  | 1.760(4)                  | 1.758(4)                  |
| 6       | 1.760(3)                  | 1.773(3)                  |                           |                           |
| 7       | 1.776(3)                  | 1.772(3)                  |                           |                           |
| 8       | 1.774(7)                  | 1.759(7)                  | 1.749(7)                  | 1.766(7)                  |
| 9       | 1.763(3)                  | 1.757(4)                  | 1.764(4)                  | 1.755(4)                  |
| 10      | 1.755(4)                  | 1.754(4)                  |                           |                           |
| 11      | 1.758(4)                  | 1.760(4)                  | 1.778(5)                  | 1.769(5)                  |
| 12      | 1.766(4)                  | 1.756(4)                  | 1.767(5)                  | 1.765(4)                  |

**Table S2:** U-O Equatorial Bond Lengths in  $\text{UO}_2^{2+}$  complexes (1-12).

| Complex | $d_{\text{U1-O3}}$<br>[Å] | $d_{\text{U1-O4}}$<br>[Å] | $d_{\text{U1-O5}}$<br>[Å] | $d_{\text{U1-O6}}$<br>[Å] | $d_{\text{U2-O5}}$<br>[Å] | $d_{\text{U2-O6}}$<br>[Å] | $d_{\text{U2-O7}}$<br>[Å] | $d_{\text{U2-O8}}$<br>[Å] | $d_{\text{U2-O9}}$<br>[Å] | $d_{\text{U2-O10}}$<br>[Å] |
|---------|---------------------------|---------------------------|---------------------------|---------------------------|---------------------------|---------------------------|---------------------------|---------------------------|---------------------------|----------------------------|
| 1       | 2.405(2)                  | 2.442(2)                  | 2.225(3)                  |                           |                           |                           |                           |                           |                           |                            |
| 2       | 2.404(3)                  | 2.533(3)                  | 2.488(3)                  | 2.439(3)                  |                           |                           |                           |                           |                           |                            |
| 3       | 2.438(4)                  | 2.438(4)                  | 2.235(4)                  |                           |                           |                           |                           |                           |                           |                            |
| 4       |                           |                           | 2.320(3)                  | 2.233(3)                  | 2.355(3)                  | 2.322(3)                  |                           | 2.376(3)                  |                           |                            |
| 5       |                           |                           | 2.255(3)                  | 2.398(3)                  | 2.374(3)                  |                           | 2.314(4)                  | 2.453(4)                  | 2.548(3)                  | 2.276(3)                   |
| 6       | 2.230(3)                  |                           | 2.285(3)                  |                           |                           |                           |                           |                           |                           |                            |
| 7       | 2.265(3)                  |                           | 2.268(3)                  |                           |                           |                           |                           |                           |                           |                            |
| 8       |                           |                           | 2.241(6)                  | 2.388(6)                  | 2.361(6)                  |                           | 2.383(6)                  | 2.435(7)                  | 2.451(7)                  | 2.263(7)                   |
| 9       |                           |                           | 2.260(3)                  | 2.409(3)                  | 2.406(3)                  |                           | 2.346(3)                  | 2.438(4)                  | 2.436(3)                  | 2.310(4)                   |
| 10      | 2.290(4)                  |                           | 2.240(4)                  |                           |                           |                           |                           |                           |                           |                            |
| 11      |                           |                           | 2.264(4)                  | 2.402(5)                  | 2.390(4)                  |                           | 2.336(4)                  | 2.451(4)                  | 2.428(4)                  | 2.293(4)                   |
| 12      |                           |                           | 2.226(4)                  | 2.398(4)                  | 2.390(4)                  |                           | 2.391(4)                  | 2.440(4)                  | 2.445(5)                  | 2.244(5)                   |

**Table S3:** U-N Bond Lengths in  $\text{UO}_2^{2+}$  complexes (1-12).

| Complex | $d_{\text{U-N1}}$<br>[Å] | $d_{\text{U-N2}}$<br>[Å] | $d_{\text{U-N3}}$<br>[Å] |
|---------|--------------------------|--------------------------|--------------------------|
| 1       | 2.552(3)                 | 2.600(3)                 |                          |
| 2       | 2.664(4)                 | 2.705(4)                 |                          |
| 3       | 2.561(5)                 | 2.540(5)                 |                          |

|    |          |          |          |
|----|----------|----------|----------|
| 4  | 2.673(4) | 2.663(4) |          |
| 5  | 2.592(4) | 2.590(4) | 2.580(4) |
| 6  | 2.558(4) | 2.600(3) | 2.587(3) |
| 7  | 2.576(3) | 2.595(4) | 2.560(3) |
| 8  | 2.561(8) | 2.583(8) | 2.575(8) |
| 9  | 2.581(5) | 2.603(4) | 2.574(4) |
| 10 | 2.568(5) | 2.604(4) | 2.589(5) |
| 11 | 2.568(6) | 2.587(5) | 2.560(5) |
| 12 | 2.580(5) | 2.585(5) | 2.564(5) |

## V. Bond Valence Summations

**Table S4:** Bond Valence Summations for oxygen atoms in Compound 4

| <b>O5</b>   | Distance (Å) | Bond Valence Sum | <b>O6</b>   | Distance (Å) | Bond Valence Sum |
|-------------|--------------|------------------|-------------|--------------|------------------|
| Bound atoms |              |                  | Bound atoms |              |                  |
| U1          | 2.320        | 0.5886           | U1          | 2.233        | 0.6961           |
| U2          | 2.355        | 0.5502           | U2          | 2.322        | 0.5864           |
|             | Sum          | 1.138            | U2'         | 2.236        | 0.6921           |
|             |              |                  |             | Sum          | 1.974            |
| <b>OW1</b>  |              |                  |             |              |                  |
| Bound atoms |              |                  |             |              |                  |
| U2          | 2.595        | 0.3465           |             |              |                  |
|             | Sum          | 0.3465           |             |              |                  |

Bond valence summations for selected oxygen atoms in 4. The values indicated that O5 is a hydroxyl group while O6 is an oxide group. <sup>1,2</sup>

**Table S5:** Bond Valence Summations for hydroxide oxygen atom in Compound 5

| <b>O5</b>   | Distance (Å) | Bond Valence Sum |
|-------------|--------------|------------------|
| Bound atoms |              |                  |
| U1          | 2.225        | 0.7069           |
| U2          | 2.374        | 0.5305           |
|             | Sum          | 1.237            |

**Table S6:** Bond Valence Summations for hydroxide oxygen atom in Compound 8

| <b>O5</b>   | Distance (Å) | Bond Valence Sum |
|-------------|--------------|------------------|
| Bound atoms |              |                  |
| U1          | 2.241        | 0.6854           |
| U2          | 2.361        | 0.5439           |
|             | Sum          | 1.229            |

**Table S7:** Bond Valence Summations for hydroxide oxygen atom in Compound **9**

| <b>O5</b>   | Distance (Å) | Bond Valence Sum |
|-------------|--------------|------------------|
| Bound atoms |              |                  |
| U1          | 2.260        | 0.6608           |
| U2          | 2.406        | 0.4987           |
|             | Sum          | 1.159            |

**Table S8:** Bond Valence Summations for oxygen atoms in Compound **11**

| <b>O5</b>   | Distance (Å) | Bond Valence Sum |
|-------------|--------------|------------------|
| Bound atoms |              |                  |
| U1          | 2.264        | 0.6557           |
| U2          | 2.390        | 0.5144           |
|             | Sum          | 1.170            |

**Table S9:** Bond Valence Summations for oxygen atoms in Compound **12**

| <b>O5</b>   | Distance (Å) | Bond Valence Sum |
|-------------|--------------|------------------|
| Bound atoms |              |                  |
| U1          | 2.264        | 0.7055           |
| U2          | 2.390        | 0.5144           |
|             | Sum          | 1.219            |

## VI. References

1. N. E. Brese and M. O'Keeffe, *Acta Crystallographica Section B*, 1991, 47, 192-197.
2. P. C. Burns, R. C. Ewing and F. C. Hawthorne, *The Canadian Mineralogist*, 1997, 35, 1551-1570.
